# Supplementary material for: Quality of Life and Decision regret Risk in Graves' Disease after Radioactive Iodine Therapy：A Prospective Cohort Study
Source: Research Square preprint supplement (doi:10.21203/rs.3.rs-8033072/v1), 2025-12-03
Supplement: Supplementary file 1 [file 1558fd6e43d7228302d1cd42.docx]

| **Domain** | **Baseline** | **3 Months** | **6 Months** | **Baseline vs 3mo (t/p)** | **Baseline vs 6mo (t/p)** | **3mo vs 6mo**  **(t/p)** |
| --- | --- | --- | --- | --- | --- | --- |
| ****Goitre**** | 17.18 ± 14.63 | 7.36 ± 9.09 | 6.40 ± 7.02 | 12.502/<0.001** | 14.609/<0.001** | 4.231/<0.001** |
| ****Hyper**** | 38.75 ± 17.68 | 18.55 ± 18.28 | 12.43 ± 13.00 | 18.010/<0.001** | 26.329/<0.001** | 13.006/<0.001** |
| ****Hypo**** | 25.77 ± 17.85 | 7.38 ± 10.56 | 6.96 ± 10.02 | 20.546/<0.001** | 21.333/<0.001** | 1.592/0.112 |
| ****Eye**** | 32.11 ± 21.25 | 15.16 ± 16.47 | 14.87 ± 15.88 | 14.425/<0.001** | 14.865/<0.001** | 1.449/0.148 |
| ****Tired**** | 58.22 ± 21.66 | 22.25 ± 17.82 | 20.91 ± 17.57 | 28.401/<0.001** | 29.279/<0.001** | 5.247/<0.001** |
| ****Cognition**** | 37.00 ± 23.57 | 10.77 ± 14.49 | 10.77 ± 14.04 | 21.423/<0.001** | 21.504/<0.001** | 0.000/1.000 |
| ****Anxiety**** | 39.03 ± 25.62 | 8.77 ± 10.74 | 8.63 ± 10.70 | 24.876/<0.001** | 24.963/<0.001** | 1.933/0.054 |
| ****Depress**** | 40.56 ± 20.52 | 13.85 ± 11.19 | | 13.37 ± 11.01 | | --- | | 26.326/<0.001** | 26.791/<0.001** | 2.767/0.006** |
| ****Suscept**** | 44.32 ± 19.07 | 18.67 ± 14.92 | 18.77 ± 15.85 | 23.253/<0.001** | 22.542/<0.001** | -0.295/0.768 |
| ****Social**** | 26.42 ± 23.37 | 11.62 ± 15.58 | 11.12 ± 14.85 | 11.795/<0.001** | 12.470/<0.001** | 3.014/0.003** |
| ****Daylife**** | 20.29 ± 19.68 | 5.14 ± 9.52 | | 5.01 ± 9.42 | | --- | | 15.823/<0.001** | 15.906/<0.001** | 2.199/0.028* |
| ****Cosmetic**** | 35.99 ± 22.20 | 23.65 ± 20.22 | 23.59 ± 20.13 | 9.493/<0.001** | 9.575/<0.001** | 0.313/0.754 |
| ****Composite**** | 38.91 ± 17.10 | 13.83 ± 11.24 | 13.15 ± 10.98 | 27.566/<0.001** | 28.413/<0.001** | 7.250/<0.001** |
| ****QoL**** | 33.60 ± 30.63 | 30.25 ± 31.11 | 22.30 ± 24.57 | 1.751/0.081 | 6.438/<0.001** | 8.929/<0.001** |
| Table 3.Changes in ThyPRO-39 | | | | | | |
