# Supplementary material for: Quality of Life and Decision regret Risk in Graves' Disease after Radioactive Iodine Therapy：A Prospective Cohort Study
Source: Research Square preprint supplement (doi:10.21203/rs.3.rs-8033072/v1), 2025-12-03
Supplement: Supplementary file 2 [file 42357da62b7c7b3532aeca60.docx]

| Information | Number | Regret Score | P value |
| --- | --- | --- | --- |
| Antithyroid Medication Duration(months) |  |  | 0.015 |
| 0 | 339 | 26.52±6.41 |  |
| >0-12 | 129 | 27.48±10.42 |  |
| >12 | 32 | 30.31±15.96 |  |
| Hyperthyroidism History Duration(months) |  |  | 0.041 |
| 0 | 236 | 26.21±5.90 |  |
| >0-12 | 158 | 27.72±9.70 |  |
| >12 | 106 | 27.74±11.08 |  |
| Iodine131_Dose(mCi) |  |  | - |
| <15 | 414 | 27.10±8.05 |  |
| 15-30 | 86 | 26.57±10.50 |  |
| Thyroid Uptake Percent(%) |  |  | - |
| 10-30 | 10 | 31.50±24.84 |  |
| 30-90 | 488 | 26.93±7.90 |  |
| >90 | 2 | 25.00±0.00 |  |
| Last Antithyroid Medication Dose(mg) |  |  | 0.008 |
| 0 | 340 | 26.62±6.52 |  |
| 2.5-10 | 113 | 27.83±12.94 |  |
| 10-20 | 35 | 29.14±7.81 |  |
| 20-30 | 8 | 22.50±5.98 |  |
| >30 | 4 | 27.50±8.66 |  |
| Awareness Hypothyroidism |  |  | 0.051 |
| Yes | 493 | 26.98±8.55 |  |
| No | 7 | 29.29±5.34 |  |
| Recommend Iodine131 Therapy |  |  | <0.001 |
| Yes | 488 | 26.32±6.38 |  |
| No | 12 | 55.00±24.68 |  |
| Liver Function |  |  | 0.512 |
| Yes | 85 | 26.47±4.86 |  |
| no | 415 | 27.12±9.08 |  |
| White Blood Cell Count |  |  | 0.003 |
| Yes | 31 | 33.06±15.79 |  |
| No | 469 | 26.61±7.66 |  |
| Thyroid Nodule |  |  | 0.538 |
| Yes | 71 | 26.48±7.53 |  |
| No | 429 | 27.1±8.67 |  |
| Thyroid Heart Disease |  |  | 0.781 |
| Yes | 12 | 26.25±8.29 |  |
| No | 488 | 27.03±8.52 |  |
| Table.2 Clinical History of patients | | | |
