# Supplementary material for: Quality of Life and Decision regret Risk in Graves' Disease after Radioactive Iodine Therapy：A Prospective Cohort Study
Source: Research Square preprint supplement (doi:10.21203/rs.3.rs-8033072/v1), 2025-12-03
Supplement: Supplementary file 3 [file dedcf34aee83c14f3e908d12.docx]

|  | Number | Regret Score | Pvalue |
| --- | --- | --- | --- |
| Gender |  |  | 0.412 |
| Male | 162 | 27.56±10.78 |  |
| Female | 338 | 26.75±7.179 |  |
| Age |  |  | - |
| 15-19 | 21 | 27.86±6.63 |  |
| 20-29 | 97 | 26.29±6.00 |  |
| 30-39 | 126 | 27.50±8.07 |  |
| 40-49 | 91 | 27.80±10.85 |  |
| 50-59 | 129 | 26.94±9.02 |  |
| >60 | 36 | 25.00±8.19 |  |
| Religious Belief |  | 27.01±8.51 | 0.887 |
| Yes | 8 | 27.50±7.701 |  |
| no | 492 | 27.00±8.539 |  |
| Marital Status |  |  | <0.001 |
| Married | 443 | 27.50±8.55 |  |
| Unmarried | 57 | 36.38±7.916 |  |
| Education Level |  |  | 0.048 |
| Junior high school or below | 192 | 26.61±10.13 |  |
| High school or vocational school | 209 | 27.11±6.64 |  |
| College diploma or bachelor's degree | 97 | 27.58±8.72 |  |
| Master's degree or above | 2 | 27.50±3.536 |  |
| Occupation |  |  | 0.032 |
| Farmer | 149 | 26.41±9.35 |  |
| Employee/Worker | 234 | 27.01±6.95 |  |
| Student | 32 | 27.81±6.83 |  |
| Retired | 10 | 26.00±6.15 |  |
| Unemployed | 10 | 35.50±23.15 |  |
| Freelancer/Self-employed | 65 | 26.85±8.412 |  |
| Monthly Income Per Capita |  |  | 0.018 |
| = <3000 CNY | 218 | 26.10±7.95 |  |
| = 3000-5000 CNY | 252 | 27.48±9.05 |  |
| = >5000 CNY | 30 | 29.67±6.94 |  |
| Family History Thyroid Disease |  |  | 0.062 |
| Yes | 73 | 25.27±5.706 |  |
| No | 427 | 27.31±8.87 |  |
| Table.1 Demographic and clinical characteristics of patients | | | |
